# Supplementary material for: Sub-9 nm high-performance and low-power transistors based on an in-plane NbSe2/MoSe2/NbSe2 heterojunction
Source: Royal Society of Chemistry journal article supplement (doi:10.1039/d3nr04514e), 2023-01-01
Supplement: d3nr04514e1.pdf [file d3nr04514e1.pdf]

## Supplementary Material for:

### **Sub-9 nm high-performance and low-power transistors based on in-plane NbSe<sub>2</sub>/MoSe<sub>2</sub>/NbSe<sub>2</sub> heterojunction**

Zeng-Lin Cao, Xiao-Hui Guo, Kai-Lun Yao, Lin Zhu \*

*School of Physics and Wuhan National High Magnetic field center, Huazhong University of Science and Technology,  
Wuhan 430074, People's Republic of China*

<sup>a)</sup> Author to whom correspondence should be addressed: [linzh@hust.edu.cn](mailto:linzh@hust.edu.cn)

### **The transport properties of vertical NbSe<sub>2</sub>/MoSe<sub>2</sub> van der Waals heterojunction FET**

The vertical NbSe<sub>2</sub>/MoSe<sub>2</sub> van der Waals (vdW) heterojunction is constructed as shown in Fig. S1 (a), where the electrons are transported along z-axis. We have calculated the transport properties of vertical NbSe<sub>2</sub>/MoSe<sub>2</sub> vdW heterojunction FET, and in-plane NbSe<sub>2</sub>/MoSe<sub>2</sub>/NbSe<sub>2</sub> heterojunction FET at the gate length of 5 nm as shown in Fig S1 (b). It is clear from Fig. S1 (b) that the in-plane NbSe<sub>2</sub>/MoSe<sub>2</sub>/NbSe<sub>2</sub> heterojunction FET has larger on-currents ( $I_{on}$ ) and sharper slopes than the vertical NbSe<sub>2</sub>/MoSe<sub>2</sub> vdW heterojunction FET. And in Table 1, the complete findings are displayed. These findings demonstrate that, in addition to having a smaller subthreshold swing (SS), the magnitude of the on-currents ( $I_{on}$ ) of in-plane NbSe<sub>2</sub>/MoSe<sub>2</sub>/NbSe<sub>2</sub>

heterojunction FET ( $311\mu\text{A}\mu\text{m}^{-1}$ ) is more than 80 times that of vertical  $\text{NbSe}_2/\text{MoSe}_2$  vdW heterojunction FET ( $3.52\mu\text{A}\mu\text{m}^{-1}$ ). This could be because there is more overlap between the electrodes and the gate of the in-plane heterojunction when the gate size is smaller. As a result, the in-plane heterojunction has a larger built-in electric field for the same gate, which worsens the upward-bending of the valence band and narrows the channel barrier. Then carriers can transport between the source and drain more quickly, resulting in higher current and lower SS of in-plane  $\text{NbSe}_2/\text{MoSe}_2/\text{NbSe}_2$  heterojunction FET.

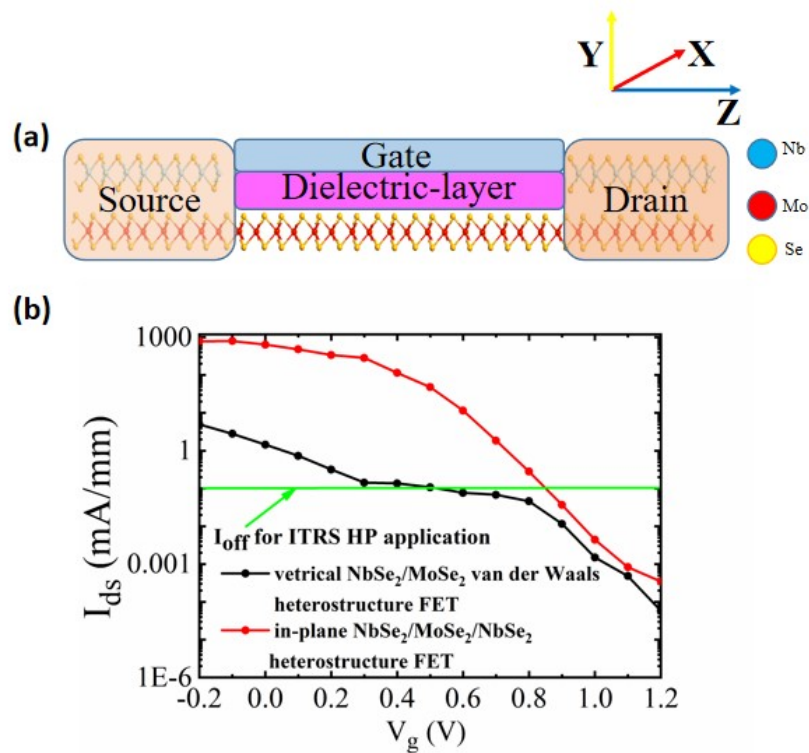

Fig. S1 (a) Schematic of the vertical  $\text{NbSe}_2/\text{MoSe}_2$  vdW heterojunction FET, where the electrons are transported along z-axis, (b) transport characteristic curves at a gate length of 5 nm, here, the black and red solids represent the  $I_{ds}$  for vertical  $\text{NbSe}_2/\text{MoSe}_2$  vdW heterojunction FET and in-plane  $\text{NbSe}_2/\text{MoSe}_2/\text{NbSe}_2$  heterojunction FET, respectively, and green solid represents  $I_{off}$  for ITRS HP application.

**Table S1** Comparison of transport properties between in-plane NbSe<sub>2</sub>/MoSe<sub>2</sub>/NbSe<sub>2</sub> heterojunction FET and vertical NbSe<sub>2</sub>/MoSe<sub>2</sub> van der Waals heterojunction FET.

|                                                                                       | $I_{\text{on}}$ [ $\mu\text{A}/\mu\text{m}$ ] | $I_{\text{on}}/I_{\text{off}}$ | SS [mV/dec] |
|---------------------------------------------------------------------------------------|-----------------------------------------------|--------------------------------|-------------|
| In-plane NbSe <sub>2</sub> / MoSe <sub>2</sub> /NbSe <sub>2</sub> heterostructure FET | 311                                           | $3.11 \times 10^4$             | 118         |
| Vertical NbSe <sub>2</sub> / MoSe <sub>2</sub> van der Waals heterostructure FET      | 3.52                                          | 35.2                           | 144         |
